# Supplementary material for: Histocompatibility Antigen, Class I, G (HLA-G)’s Role during Pregnancy and Parturition: A Systematic Review of the Literature
Source: MDPI journal article supplement (doi:10.3390/life11101061), 2021-10-09
Supplement: s1 [file s1]

| Authors               | Year | Type of Study                             | Type of Sample                       | Methods             | Topic of Study       | Localization of HLA-G                                                                                                                     | HLA-G role in pregnancy                                                                                                                                                                                      | HLA-G interactions in pregnancy                                                                                                                     |
|-----------------------|------|-------------------------------------------|--------------------------------------|---------------------|----------------------|-------------------------------------------------------------------------------------------------------------------------------------------|--------------------------------------------------------------------------------------------------------------------------------------------------------------------------------------------------------------|-----------------------------------------------------------------------------------------------------------------------------------------------------|
| A. King et al.        | 1996 | Clinical and in vitro                     | CL (BEWO, JEG-3) Placenta            | FC, IHC, WB         | HLA-G Expression     | 1st trimester placental EVT                                                                                                               |                                                                                                                                                                                                              |                                                                                                                                                     |
| J. Kusanovic et al.   | 2009 | Clinical                                  | Amniotic Fluid                       | ELISA               | Infection            | Amniotic fluid                                                                                                                            | HLA-G elevated in PTB and intraamniotic infection. sHLA-G may play role in immune response                                                                                                                   |                                                                                                                                                     |
| P. Vianna et al.      | 2007 | Clinical                                  | PB                                   | DNA PCR             | Preeclampsia         |                                                                                                                                           | 14 base pair polymorphism is associated with PE                                                                                                                                                              |                                                                                                                                                     |
| S. Kovats et al.      | 1990 | Clinical                                  | CL (Bewo, JAR, JEG-3) Placenta       | WB                  | HLA-G Expression     | Placental villous cytotrophoblast                                                                                                         |                                                                                                                                                                                                              | More HLA-G in 1st trimester than 3rd trimester, HLA-G is transcriptionally regulated                                                                |
| R. Apps et al.        | 2007 | In vitro (primary cells)                  | CL (JEG-3) Placenta                  | WB                  | Gestation            | Placental trophoblast                                                                                                                     |                                                                                                                                                                                                              | LILRB2 on decidual myelomonocytic cells preferentially bind dimeric HLA-G of trophoblast cells, co-culture of HLA-G+ cells increases IL-6 and IL-10 |
| X. Zhou et al.        | 2012 | In vitro (immortalized cells)             | CL (HTR-8/Svneo) Placenta,           | IHC                 | Preeclampsia         |                                                                                                                                           |                                                                                                                                                                                                              | Oxidative stress decreases HLA-G in placentas with PE.                                                                                              |
| C. Aldrich et al.     | 2000 | Clinical                                  | CB, Placenta                         | dPCR                | Preeclampsia         |                                                                                                                                           | HLA-G 1597 delta C null mutation not associated with PE or growth restriction                                                                                                                                |                                                                                                                                                     |
| S. Djuriscic et al.   | 2015 | Clinical                                  | PB, Placenta                         | FC, ELISA           | HLA-G Expression     |                                                                                                                                           | Placental NK cells express more KIR2DL4 peripheral blood NK. sHLA-G levels are directly related to KIR2DL4 levels. sHLA-G was significantly increased in aborted fetal tissue compared with peripheral blood |                                                                                                                                                     |
| S. Yie et al.         | 2008 | Clinical                                  | CL (JEG-3), PB, Placenta             | RT rPCR             | Preeclampsia         |                                                                                                                                           | A single base-pair mutation in the HLA-G gene 3'-untranslated region is associated with reduced HLA-G levels and shorter HLA-G half-lives in PE.                                                             |                                                                                                                                                     |
| P. Jahan et al.       | 2014 | Clinical                                  | PB                                   | dPCR                | Preeclampsia         |                                                                                                                                           | 14 base pair polymorphism is not associated with preeclampsia                                                                                                                                                |                                                                                                                                                     |
| T. Kanai et al.       | 2003 | In vitro (primary and immortalized cells) | CL (CRL-1855), Placenta              | N/A                 | Inflammation         |                                                                                                                                           | sHLA-G reduces TNF- $\alpha$ and IFN- $\gamma$ but does not change IL-4 in decidual mononuclear cells                                                                                                        |                                                                                                                                                     |
| P. Sedlmayr et al.    | 2002 | Clinical and in vitro                     | Placenta                             | IHC, RT rPCR        | HLA-G Expression     | Not present on placental decidua macrophage                                                                                               |                                                                                                                                                                                                              |                                                                                                                                                     |
| S. Rajagopalan et al. | 2006 | In vitro (primary and immortalized cells) | CL (221-HLA-Cw3, 293T, NKL, YTS), PB | ELISA, IHC, RT rPCR | Inflammation         |                                                                                                                                           | sHLA-G induced secretion of proinflammatory and proangiogenic cytokines by resting NK cells. HLA-G signals via endosomal signaling.                                                                          |                                                                                                                                                     |
| M. Chauhan et al.     | 2011 | In vitro (primary and immortalized cells) | CL (HTR-8SV/Neo) PB, Placenta        | IF, RT rPCR, WB     | Trophoblast Invasion |                                                                                                                                           | ADM2 upregulates HLA-G at the maternal-fetal interface facilitating trophoblast invasion and migration via MAPK3/1 phosphorylation                                                                           |                                                                                                                                                     |
| P. Hsu et al.         | 2012 | Clinical and in vitro                     | PB, Placenta                         | FC                  | Preeclampsia         | Decidual CD14(+)DC-SIGN(+)                                                                                                                | CD14+, SIGN+ express more HLA-G than CD14, SIGN- cells; CD14+SIGN+ cells induce immune suppressive Treg cells                                                                                                |                                                                                                                                                     |
| N. Hara et al.        | 1996 | Clinical                                  | Placenta                             | IHC                 | Preeclampsia         | Placental trophoblast                                                                                                                     | Poor staining of HLA-G on trophoblasts in PE patients                                                                                                                                                        |                                                                                                                                                     |
| M. O'Brien et al.     | 2001 | Clinical                                  | Placenta                             | RT rPCR, Sequencing | Preeclampsia         |                                                                                                                                           | Polymorphisms associated with lower HLA-G3 transcript was observed in mild PE                                                                                                                                |                                                                                                                                                     |
| M. Kirszenbaum et al. | 1994 | Clinical                                  | PB, Placenta                         | RT rPCR             | HLA-G Expression     | Maternal serum                                                                                                                            |                                                                                                                                                                                                              |                                                                                                                                                     |
| K. Yelavarthi et al.  | 1991 | Clinical                                  | Placenta                             | IHC, ISH            | HLA-G Expression     | 1st trimester placental cytotrophoblast, 1st trimester villous trophoblast (not 3rd), chorionic membrane trophoblast membrane trophoblast |                                                                                                                                                                                                              |                                                                                                                                                     |
| S. Rokhafrooz et al.  | 2018 | Clinical                                  | PB                                   | ELISA, PCR          | Preeclampsia         | Soluble HLA-G found in serum                                                                                                              | sHLA-G levels are decreased in PE                                                                                                                                                                            | HLA-G expression is regulated by elements in 5' URR and 3' UTR                                                                                      |
| J. Emmery et al.      | 2017 | Clinical                                  | PB, CB                               | dPCR, Sequencing    | HLA-G Expression     |                                                                                                                                           | 14bp HLA-G deletion is associated with higher birthweight and elevated expression of HLA-G on the trophoblast.                                                                                               |                                                                                                                                                     |
| B. His et al.         | 1984 | Clinical                                  | Placenta                             | IHC                 | HLA-G Expression     | Fetal amniochorion                                                                                                                        |                                                                                                                                                                                                              |                                                                                                                                                     |
| S. Basak et al.       | 2020 | In vitro (primary and immortalized cells) | CL (JEG, HMEC-1, HTR-8/Svneo, PC3)   | RT rPCR, WB         | HLA-G Expression     |                                                                                                                                           |                                                                                                                                                                                                              | Curcumin stimulates HLA-G in vitro                                                                                                                  |
| Y. Yang et al.        | 1995 | In vitro (primary and immortalized cells) | CL (JEG-3, Jar), Placenta            | FC, IHC, NB, WB     | HLA-G Expression     |                                                                                                                                           |                                                                                                                                                                                                              | TNF-alpha, beta, and gamma, and TGF-alpha moderately enhance HLA-G mRNA without protein level changes                                               |
| M. Petroff et al.     | 2002 | In vitro (primary and immortalized cells) | CL (U937) Placenta                   | FC, RT PCR          | Immune Mechanism     |                                                                                                                                           |                                                                                                                                                                                                              | Decidual macrophages express the HLA-G receptors ILT2 and ILT4                                                                                      |
| A. Wallace et al.     | 2015 | Clinical                                  | Decidua NK cells, Placenta           | FC                  | HLA-G Expression     |                                                                                                                                           | Decidual NK cells from pregnancies with elevated uterine artery index express less KIR2DL and LILRB1                                                                                                         |                                                                                                                                                     |
| S. Lou et al.         | 2018 | Clinical                                  | CL (HTR-8/Svneo), Placenta           | RT PCR, WB          | Preeclampsia         |                                                                                                                                           | PE is associated with lower levels of JHDM1D. JHDM1D regulates HLA-G expression.                                                                                                                             |                                                                                                                                                     |

|                               |      |                               |                                                                                                  |                                    |                       |                                                                               |                                                                                                                                                                                                    |                                                                                                                                                |
|-------------------------------|------|-------------------------------|--------------------------------------------------------------------------------------------------|------------------------------------|-----------------------|-------------------------------------------------------------------------------|----------------------------------------------------------------------------------------------------------------------------------------------------------------------------------------------------|------------------------------------------------------------------------------------------------------------------------------------------------|
| J. Cross et al.               | 1999 | In vitro (immortalized cells) | CL (JAR, JEG-3)                                                                                  | IHC, NB, WB                        | Inflammation          |                                                                               |                                                                                                                                                                                                    | HLA-G is the predominant MHC class I antigen produced by JEG-3 cells, levels are unaffected by IFN                                             |
| R. Hackmon et al.             | 2017 | In vitro (primary cells)      | Placenta                                                                                         | IHC                                | Trophoblast Invasion  | 1st trimester placental EVT                                                   | HLA-G is expressed on the surface of actively migrating EVT                                                                                                                                        |                                                                                                                                                |
| K. Kronquist et al.           | 1984 | Clinical                      | Amniotic fluid, PB                                                                               | WB                                 | HLA-G Expression      | Amniotic fluid                                                                |                                                                                                                                                                                                    |                                                                                                                                                |
| X. Wei et al.                 | 1990 | Clinical                      | Placenta                                                                                         | NB                                 | HLA-G Expression      | 1st trimester placenta, 3rd trimester placental EVT                           |                                                                                                                                                                                                    |                                                                                                                                                |
| W. Faulk et al.               | 1976 | Clinical                      | Placenta                                                                                         | IF                                 | HLA-G Expression      | B2-microglobulin not identified in trophoblasts                               |                                                                                                                                                                                                    |                                                                                                                                                |
| L. Sun et al.                 | 2008 | In vitro (primary cells)      | CL (JEG-3)                                                                                       | RT PCR, WB                         | Immune Mechanism      |                                                                               | Downregulation of HLA-G is associated with increased NK-mediated cell killing                                                                                                                      |                                                                                                                                                |
| R. Marlin et al.              | 2012 | Clinical                      | Placenta                                                                                         | FC                                 | Immune Mechanism      | Decidual NK cells, antigen presenting cells, and T lymphocytes                | HLA-G plays a role in activation homeostasis of decidual NK cells                                                                                                                                  |                                                                                                                                                |
| A. Steinborn et al.           | 2007 | Clinical                      | PB                                                                                               | ELISA                              | Preeclampsia          | Maternal serum                                                                | sHLA-G levels are high in 1st trimester then decrease. In 2nd trimester decreased HLA-G levels are associated with PE or growth restriction. In 3rd trimester increased sHLA-G associated with PTL |                                                                                                                                                |
| J. Choi et al.                | 2014 | In vitro (primary cells)      | CL (HTR-8/Svneo, WI-38), CB, Placenta                                                            | ELISA, FC, IHC, RT rPCR, Zygomerty | Trophoblast Invasion  |                                                                               | Chorion plate mesenchymal stem cells activate immunosuppression and trophoblast invasion via HLA-G                                                                                                 | Placental chorion plate derived mesenchymal stem cell coculture with trophoblasts increase sHLA-G                                              |
| M. Du et al.                  | 2014 | In vitro (primary cells)      | Placenta                                                                                         | ELISA, FC, IHC, WB                 | Inflammation          |                                                                               |                                                                                                                                                                                                    | Decidual Treg cells promote HLA-G expression on trophoblasts                                                                                   |
| F. Shido et al.               | 2006 | In vitro (immortalized cells) | CL (JEG-3)                                                                                       | ELISA, FC, WB                      | Trophoblast Invasion  |                                                                               |                                                                                                                                                                                                    | ERAP1 is involved in the regulation of surface HLA-G on EVT in the presence of LIF                                                             |
| A. Blaschitz et al.           | 1997 | Clinical                      | CL (JAR, JEG-3), Placenta                                                                        | IHC                                | HLA-G Expression      | 1st trimester villous cytotrophoblast stem cells and endovascular trophoblast |                                                                                                                                                                                                    |                                                                                                                                                |
| R. Apps et al.                | 2011 | Clinical and in vitro         | PB, Placenta                                                                                     | FC, IHC, dPCR                      | HLA-G Expression      |                                                                               | 1st trimester decidual NK cells are not responsive to HLA-G                                                                                                                                        | 14 bp polymorphism does not affect surface levels of HLA-G                                                                                     |
| P. Hsu et al.                 | 2014 | Clinical                      | CL (JEG-3), PB                                                                                   | FC                                 | Inflammation          |                                                                               | Lower levels of peripheral blood CD4+HLA-G+ cells in PE                                                                                                                                            | CD45+ SIGN+ antigen presenting cells enhance HLA-G expression on CD4 cells in vitro. IL-10 augments expression of HLA-G in monocyte derived DC |
| X. Zhang et al.               | 2007 | Clinical                      | PB, miscarriage                                                                                  | IHC, dPCR                          | Infection             |                                                                               | HLA-G expression in CMV+ is higher in placental villi. Intrauterine HCMV infection at early pregnant stage is closely related to HLA-G expression at the maternal-fetal interface.                 |                                                                                                                                                |
| T. Komatsu et al.             | 1998 | Clinical                      | Uterus (Hysterectomy), Placenta                                                                  | IHC, NB                            | HLA-G Expression      | Endometrium                                                                   |                                                                                                                                                                                                    | Progestins increase HLA-G transcription along with decidualization of human endometrial stromal cells                                          |
| O. Devergne et al.            | 2001 | In vitro (immortalized cells) | CL (BEWO, BJAB, BL41, CEM-T, COS7, IB4, HL-60, Jar, Jurkat, Molt-4, NC37, Ramos, U937), Placenta | ELISA, IHC, IP, WB                 | Infection             |                                                                               |                                                                                                                                                                                                    | Epstein Barr Virus induced gene 3 is presented by HLA-G                                                                                        |
| H. Hutter et al.              | 1996 | Clinical                      | Placenta                                                                                         | IHC                                | Trophoblast Invasion  | Invading trophoblast (beta-2-m macroglobulin), Chorion laeve (HLA-G)          |                                                                                                                                                                                                    |                                                                                                                                                |
| X. Zhu et al.                 | 2012 | Clinical                      | Placenta                                                                                         | RT rPCR), WB                       | Preeclampsia          |                                                                               | Placental HLA-G is decreased in PE                                                                                                                                                                 |                                                                                                                                                |
| G. Colbern et al.             | 1994 | Clinical                      | Placenta                                                                                         | Ribonuclease protection assay      | Preeclampsia          |                                                                               | HLA-G levels are reduced in PE trophoblasts                                                                                                                                                        |                                                                                                                                                |
| J. Proll et al.               | 1999 | Clinical                      | Placenta                                                                                         | IHC                                | HLA-G Expression      | 1st trimester extravillous trophoblasts                                       |                                                                                                                                                                                                    |                                                                                                                                                |
| A. Farina et al.              | 2011 | Clinical                      | CVS, Placenta                                                                                    | RT rPCR                            | Preeclampsia          |                                                                               | HLA-G is decreased in 1st trimester patients that progress to PE                                                                                                                                   |                                                                                                                                                |
| D. Veljkovic Vujaklija et al. | 2013 | In vitro (immortalized cells) | CL (K562), Decidua, PB, Placenta                                                                 | ELISA, FC, IHC                     | Inflammation          |                                                                               | Decidual CD56+ cells decrease granulysin expression and secretion when co-cultured with K562 HLA-G expressing cells                                                                                |                                                                                                                                                |
| F. Robert-Gangneux et al.     | 2011 | Clinical                      | Amniotic fluid                                                                                   | ELISA                              | Infection             | Amniotic fluid                                                                | sHLA-G increased in amniotic fluid in pregnancies with toxoplasmosis                                                                                                                               |                                                                                                                                                |
| J. Prins et al.               | 2016 | Clinical                      | PB, Placenta                                                                                     | RT rPCR                            | Preeclampsia          |                                                                               | HLA-G mRNA higher in PE decidual lymphocytes and macrophages                                                                                                                                       |                                                                                                                                                |
| G. Amodio et al.              | 2013 | Clinical                      | PB, Placenta                                                                                     | FC                                 | HLA-G Expression      | DC-10 cells in peripheral blood and DC-10 and CD4+ cells in decidua           |                                                                                                                                                                                                    |                                                                                                                                                |
| T. Hvid et al.                | 2004 | Clinical                      | Placenta                                                                                         | IHC, Microarray                    | Preeclampsia          |                                                                               | Less HLA-G mRNA in PE patients                                                                                                                                                                     | HLA-G genotype not associated with protein quantity                                                                                            |
| A. Asako et al.               | 2016 | In vitro (immortalized cells) | CL (HChEpC1b), Placenta                                                                          | Microarray, WB                     | Trophoblast Invasion  |                                                                               |                                                                                                                                                                                                    | miRNA-365 represses HLA-G expression under hypoxic conditions                                                                                  |
| E. Ivanova-Todorova et al.    | 2009 | In vitro (primary cells)      | Adipose tissue, Bone marrow, Placenta                                                            | ELISA, RT rPCR, WB                 | Endocrine Interaction | Decidua-derived mesenchymal stem cells                                        |                                                                                                                                                                                                    | Progesterone upregulates HLA-G                                                                                                                 |
| T. Hvid et al.                | 2004 | Clinical                      | PB                                                                                               | RT rPCR                            | PTB/PPROM/Abortion    |                                                                               | 14 bp positive genotype associated with increased gestational age adjusted birth weight and placental weight                                                                                       |                                                                                                                                                |
| M. McMaster et al.            | 1998 | Clinical                      | Amniotic fluid, Fetal membranes, Placenta                                                        | IHC, WB                            | HLA-G Expression      | Amniotic fluid                                                                |                                                                                                                                                                                                    |                                                                                                                                                |

|                        |      |                                           |                                                                      |                                     |                      |                                                                                                                                                                                          |                                                                                                                                         |                                                                                                                                                |
|------------------------|------|-------------------------------------------|----------------------------------------------------------------------|-------------------------------------|----------------------|------------------------------------------------------------------------------------------------------------------------------------------------------------------------------------------|-----------------------------------------------------------------------------------------------------------------------------------------|------------------------------------------------------------------------------------------------------------------------------------------------|
| N. Kostlin et al.      | 2017 | Clinical                                  | PB, Placenta                                                         | FC                                  | Immune Mechanism     |                                                                                                                                                                                          | Peripheral blood granulocytic myeloid derived suppressor cells activity are increased by HLA-G ILT2 and ILT4 signaling                  |                                                                                                                                                |
| C. Menier et al.       | 2000 | Clinical and in vitro                     | CL (M8, YT2C2-PR), Placenta                                          | FC, WB                              | Immune Mechanism     |                                                                                                                                                                                          |                                                                                                                                         | Truncated HLA-G forms can inhibit NK cells                                                                                                     |
| L. Lombardelli et al.  | 2013 | In vitro (primary cells)                  | CL (Tetanus toxoid (TT)-specific T CLs), PB                          | ELISA                               | Inflammation         |                                                                                                                                                                                          | sHLA-G5 increases IL-12 production from macrophages and IL-4 from CD4+ cells in vitro                                                   |                                                                                                                                                |
| B. Hsi et al.          | 1982 | Clinical                                  | Decidua cells, Fetal membranes, PB, Placenta                         | IHC                                 | HLA-G Expression     | amniochorion chorion and amniotic epithelium lack B2 macroglobulin                                                                                                                       |                                                                                                                                         |                                                                                                                                                |
| K. Lim et al.          | 1997 | Clinical                                  | Placenta                                                             | RT rPCR                             | Preeclampsia         |                                                                                                                                                                                          | HLA-G is down regulated in PE                                                                                                           |                                                                                                                                                |
| O. Blanco et al.       | 2008 | Clinical                                  | Placenta                                                             | FC, IF, RT rPCR, WB                 | Inflammation         | Decidual stromal cells                                                                                                                                                                   | IL-10, IFN $\gamma$ , progesterone, and cAMP (not IL-2) increase the expression of HLA-G in decidual stromal cells                      |                                                                                                                                                |
| L. Klitkou et al.      | 2015 | Clinical                                  | CB, PB                                                               | ELISA                               | HLA-G Expression     | Cord blood, Maternal serum                                                                                                                                                               | sHLA-G in maternal blood decreases as gestation advances, sHLA-G higher in maternal blood than in umbilical blood at term               |                                                                                                                                                |
| M. Dahl et al.         | 2015 | Clinical                                  | PB, Placenta                                                         | ELISA, dPCR, Sequencing             | HLA-G Expression     |                                                                                                                                                                                          |                                                                                                                                         | Increasing number of 14 bp inserts associated with increased sHLA-G at term                                                                    |
| X. Zhang et al.        | 2014 | Clinical                                  | Placenta                                                             | RT rPCR, WB                         | Cholestasis          |                                                                                                                                                                                          | miR-148a down regulates HLA-G in intrahepatic cholestasis of pregnancy                                                                  |                                                                                                                                                |
| T. Kanai et al.        | 2001 | Clinical                                  | CL (HLA class I-deficient B-lymphoblast CL, 221 cells), PB, Placenta | ELISA                               | Inflammation         |                                                                                                                                                                                          | HLA-G induces a Th2 cytokine profile state in decidual mononuclear cells and peripheral blood mononuclear cells                         |                                                                                                                                                |
| M. McMaster et al.     | 1995 | In vitro (primary and immortalized cells) | CL (JEG-3), Placenta                                                 | IHC, NB                             | HLA-G Expression     | Placental cytotrophoblast                                                                                                                                                                | HLA-G mRNA levels decrease as gestation progresses                                                                                      |                                                                                                                                                |
| Y. Tang et al.         | 2015 | Clinical                                  | PB, Placenta                                                         | ELISA, IHC, Sequencing RT rPCR      | Preeclampsia         |                                                                                                                                                                                          | HLA-G is hypermethylated in PE and HLA-G levels are decreased                                                                           |                                                                                                                                                |
| T. Nagamatsu et al.    | 2004 | In vitro (primary cells)                  | Placenta                                                             | FC, RT rPCR, WB                     | HLA-G Expression     |                                                                                                                                                                                          |                                                                                                                                         | Hypoxia does not affect the levels of HLA-G in trophoblasts                                                                                    |
| P. Moreau et al.       | 1999 | Clinical                                  | Placenta                                                             | NB, RNase Protection Assays, RT PCR | Inflammation         |                                                                                                                                                                                          |                                                                                                                                         | IL-10 induces HLA-G expression on trophoblasts and monocytes                                                                                   |
| S. Kshirsagar et al.   | 2012 | Clinical and in vitro                     | Placenta                                                             | IF, WB                              | Immune Mechanism     | 1st trimester placental exosome                                                                                                                                                          | Cytotrophoblast derived exosomes are a source of exosome associated HLA-G5                                                              |                                                                                                                                                |
| G. Chumbley et al.     | 1993 | Clinical                                  | Placenta                                                             | NB, SB                              | HLA-G Expression     | Cytotrophoblast cell columns, interstitial trophoblast, endovascular trophoblast, placental bed giant cells, villous cytotrophoblast, villous mesenchymal cells. Not syncytiotrophoblast |                                                                                                                                         |                                                                                                                                                |
| M. Stout et al.        | 2015 | Clinical                                  | Placenta                                                             | IHC                                 | PTB/PPROM/Abortion   |                                                                                                                                                                                          | Higher levels of HLA-G associated with PTB                                                                                              |                                                                                                                                                |
| L. Chen et al.         | 2010 | In vitro (primary and immortalized cells) | PB, Placenta                                                         | FC, IHC, RT rPCR, WB                | Immune Mechanism     |                                                                                                                                                                                          |                                                                                                                                         | HLA-G knockdowns diminished EVT cell resistance to NK mediated cytotoxicity                                                                    |
| T. Poehlmann et al.    | 2006 | In vitro (primary cells)                  | Placenta                                                             | WB                                  | Immune Mechanism     |                                                                                                                                                                                          |                                                                                                                                         | sHLA-G reduced NK cell expression of STAT3 as well as several downstream effects, such as perforin expression, proliferation and cytotoxicity. |
| L. Lombardelli et al.  | 2016 | In vitro (primary cells)                  | Decidua                                                              | FC, RT rPCR                         | Trophoblast Invasion |                                                                                                                                                                                          |                                                                                                                                         | HLA-G5 is important for implantation                                                                                                           |
| J. Nevalainen et al.   | 2017 | Clinical                                  | Placenta                                                             | Microarray                          | Preeclampsia         |                                                                                                                                                                                          |                                                                                                                                         | HLA-G mRNA increased in severe PE                                                                                                              |
| D. Goldman-Wohl et al. | 2000 | Clinical                                  | Placenta                                                             | IHC                                 | Preeclampsia         |                                                                                                                                                                                          |                                                                                                                                         | Decreased HLA-G associated with PE                                                                                                             |
| J. Lata et al.         | 1992 | Clinical                                  | Placenta                                                             | ISH                                 | HLA-G Expression     | 1st trimester syncytiotrophoblast                                                                                                                                                        |                                                                                                                                         |                                                                                                                                                |
| L. Marozio et al.      | 2017 | Clinical                                  | PB                                                                   | ELISA                               | Preeclampsia         | Peripheral blood                                                                                                                                                                         | Low levels of maternal plasma sHLA-G associated with PE                                                                                 |                                                                                                                                                |
| C. Mando et al.        | 2016 | Clinical                                  | CB, PB                                                               | dPCR                                | Preeclampsia         | Peripheral blood                                                                                                                                                                         | HLA-G 14 bp polymorphism unrelated to pregnancy hypertensive disorders or fetal growth restriction                                      |                                                                                                                                                |
| A. Lin et al.          | 2006 | Clinical                                  | Placenta                                                             | dPCR                                | Preeclampsia         |                                                                                                                                                                                          | HLA-G polymorphism not associated with PE                                                                                               |                                                                                                                                                |
| I. Bilyk et al.        | 2014 | Clinical                                  | PB                                                                   | ELISA                               | PTB/PPROM/Abortion   | Peripheral blood                                                                                                                                                                         | First trimester maternal serum sHLA-G not correlated with high risk pregnancies                                                         |                                                                                                                                                |
| S. Luo et al.          | 2017 | In vitro (immortalized cells)             | CL (HTR-8/Syneo)                                                     | FC, RT rPCR, WB                     | Preeclampsia         |                                                                                                                                                                                          | Decreased miR-148a in PE                                                                                                                | miR-148a upregulates HLA-G post transcriptionally                                                                                              |
| L. Gorvel et al.       | 2014 | In vitro (primary cells)                  | PB, Placenta                                                         | FC, IHC, Microarray, WB             | Inflammation         |                                                                                                                                                                                          | Decidual DC express HLA-G and do not produce inflammatory cytokines after stimulation with LPS or peptidoglycan                         |                                                                                                                                                |
| N. Sageshima et al.    | 2003 | Clinical                                  | Placenta                                                             | EM, IHC                             | Preeclampsia         |                                                                                                                                                                                          | Subset of extravillous trophoblasts that do not express HLA-G were found to also show signs of necrosis in both normal and PE placentas |                                                                                                                                                |
| R. McIntire et al.     | 2008 | Clinical                                  | Placenta                                                             | IHC, RT rPCR                        | HLA-G Expression     |                                                                                                                                                                                          |                                                                                                                                         | The HLA-G receptors LILRB1 were found in placental stromal cells and LILRB2 in vascular smooth muscle                                          |

|                             |      |                                           |                                                      |                                         |                       |                                                                              |                                                                                                                                                   |                                                                                                                                            |
|-----------------------------|------|-------------------------------------------|------------------------------------------------------|-----------------------------------------|-----------------------|------------------------------------------------------------------------------|---------------------------------------------------------------------------------------------------------------------------------------------------|--------------------------------------------------------------------------------------------------------------------------------------------|
| A. Orozco et al.            | 2009 | Clinical and in vitro                     | CL (JEG-3), PB                                       | FC                                      | Preeclampsia          | Placental microparticles                                                     |                                                                                                                                                   | Peripheral blood DNA microparticles were associated with HLA-G, these levels are increased in 1st and 2nd trimester, as well as in term PE |
| G. Datema et al.            | 2003 | Clinical                                  | Fetal membranes, Placenta                            | IHC                                     | Preeclampsia          |                                                                              | No difference in HLA-G in chorionic or extravillous trophoblasts in preterm or PE patients, elevated HLA-G in term amnion from preterm deliveries |                                                                                                                                            |
| S. Yie et al.               | 2006 | In vitro (primary and immortalized cells) | CL (JEG, BEWO), Placenta                             | ELISA, RT rPCR, WB                      | Endocrine Interaction | First trimester trophoblasts and JEG-3                                       |                                                                                                                                                   | Progesterone upregulates HLA-G                                                                                                             |
| S. Yie et al.               | 2006 | In vitro (immortalized cells)             | CL (JEG-3)                                           | ELISA, EMSA                             | Endocrine Interaction |                                                                              |                                                                                                                                                   | HLA-G regulation involves progesterone receptor element in HLA-G promoter region                                                           |
| A. Ishitani et al.          | 2003 | Clinical                                  | Placenta                                             | ELISA, ICC, IHC, WB, Proteomics         | HLA-G Expression      | Extravillous trophoblasts (membrane bound), Placental trophoblasts (soluble) |                                                                                                                                                   |                                                                                                                                            |
| Y. Hamai et al.             | 1999 | Clinical                                  | Amniotic fluid                                       | ELISA                                   | HLA-G Expression      | Amniotic fluid                                                               |                                                                                                                                                   |                                                                                                                                            |
| G. Chumbley et al.          | 1994 | In vitro (primary cells)                  | Placenta                                             | NB, WB                                  | Immune Mechanism      |                                                                              | HLA-G transfected cells resistant to decidual NK lysis                                                                                            |                                                                                                                                            |
| C. Solier et al.            | 2002 | In vitro (primary and immortalized cells) | CL (JAR, JEG-3), Placenta                            | ELISA, FC, IHC, RT rRNA, Sequencing, WB | Immune Mechanism      | Placental villous trophoblast                                                |                                                                                                                                                   | sHLA-G1 from villous trophoblasts induced apoptosis of CD8+ cells                                                                          |
| M. Han et al.               | 2014 | In vitro (primary cells)                  | CL (BEWO), Decidua, Placenta                         | ELISA, RT rPCR, WB                      | Infection             |                                                                              |                                                                                                                                                   | Neutralizing HLA-G decreased dendritic NK apoptosis in Toxoplasma gondii infection                                                         |
| F. Beneventi et al.         | 2016 | Clinical                                  | PB, Vaginal fluid                                    | ELISA                                   | PTB/PPROM/Abortion    | Maternal serum, vaginal fluid                                                | Elevated sHLA-G in peripheral blood and vaginal secretions of patients with PPRM                                                                  |                                                                                                                                            |
| W. Chu et al.               | 1998 | In vitro (primary and immortalized cells) | CL (JAR, JEG-3), Placenta                            | ELISA, IHC, RT rPCR                     | Inflammation          | Placental trophoblast, activated placental macrophages                       |                                                                                                                                                   |                                                                                                                                            |
| A. Lindaman et al.          | 2006 | In vitro (immortalized cells)             | CL (immortalized NK cells)                           | FC, IP                                  | Immune Mechanism      |                                                                              |                                                                                                                                                   | sHLA-G effectively blocked NK lysis of target cells and induced peripheral NK cell apoptosis                                               |
| J. McCormick et al.         | 2009 | In vitro (immortalized cells)             | CL (SGHPL-4)                                         | ELISA, RT rPCR, WB                      | Trophoblast Invasion  |                                                                              | sHLA-G may be involved in regulating trophoblast invasion                                                                                         |                                                                                                                                            |
| Y. Guo et al.               | 2013 | In vitro (primary and immortalized cells) | CL (JEG-3), Placenta                                 | ELISA, IHC, RT rPCR, WB                 | Trophoblast Invasion  |                                                                              | HLA-G5 induces trophoblast invasion via KIR2DL4 and LILRB1                                                                                        |                                                                                                                                            |
| R. Rizzo et al.             | 2016 | Clinical                                  | CB, PB, Amniotic fluid                               | ELISA, WB                               | Infection             |                                                                              |                                                                                                                                                   | Elevated sHLA-G found in maternal peripheral blood and amniotic fluid of patients infected with CMV                                        |
| M. Zdravkovic et al.        | 1999 | In vitro (immortalized cells)             | CL (JAR, JEG-3, HT-116, HTR-8)                       | IHC, RT rPCR, Sequencing, WB            | Immune Mechanism      |                                                                              | Cell lines expressing HLA-G are resistant to NK lysis                                                                                             |                                                                                                                                            |
| P. Morales et al.           | 2007 | In vitro (primary cells)                  | CL (HELA), Placenta                                  | WB                                      | HLA-G Expression      |                                                                              | Villous cytotrophoblasts produce sHLA-G                                                                                                           |                                                                                                                                            |
| L. Rieger et al.            | 2002 | In vitro (primary and immortalized cells) | CL (k-562, NKL)                                      | ELISA                                   | Immune Mechanism      |                                                                              | HLA-G has immunosuppressive effects on large granular lymphocytes                                                                                 |                                                                                                                                            |
| F. Eskicioglu et al.        | 2016 | Clinical                                  | Placenta                                             | WB                                      | PTB/PPROM/Abortion    |                                                                              | HLA-G levels not associated with recurrent miscarriages                                                                                           |                                                                                                                                            |
| D. Darmochwal-Kolarz et al. | 2012 | Clinical                                  | PB                                                   | ELISA                                   | Preeclampsia          |                                                                              | Peripheral sHLA-G are highest in 2nd trimester (2nd>1st>3rd), sHLA-G in peripheral blood lower in PE                                              |                                                                                                                                            |
| A. Iversen et al.           | 2008 | Clinical                                  | CB, Placenta                                         | dPCR, Sequencing, RT rPCR               | Preeclampsia          |                                                                              | 14bp HLA-G polymorphism not associated with PE                                                                                                    |                                                                                                                                            |
| T. Tilburgs et al.          | 2015 | In vitro (primary cells)                  | CL (primary fetal HLA-G, EVT), Decidua, PB, Placenta | Confocal, FC, RT dPCR, FC, WB           | Immune Mechanism      |                                                                              |                                                                                                                                                   | dNK interaction with EVT leads to acquisition of membrane HLA-G of dNK cells via trogocytosis                                              |
| J. Houlihan et al.          | 1995 | Clinical                                  | Fetal membranes                                      | FC, IHC, Proteomics, RT rPCR            | HLA-G Expression      | Fetal membrane amnion and chorion                                            |                                                                                                                                                   |                                                                                                                                            |
| A. Blaschitz et al.         | 2005 | Clinical                                  | Placenta                                             | ELISA, IHC, WB                          | HLA-G Expression      | Placental EVT                                                                |                                                                                                                                                   |                                                                                                                                            |
| X. Xu et al.                | 2013 | In vitro and in vivo                      | Endometrium, Placenta                                | FC, RT rPCR                             | Infection             |                                                                              |                                                                                                                                                   | Toxoplasmosis in pregnancy elevates HLA-G                                                                                                  |
| I. Manaster et al.          | 2012 | Clinical and in vitro                     | CL (RKO, 721.221), PB, Placenta                      | IHC, Luciferase                         | HLA-G Expression      |                                                                              |                                                                                                                                                   | miR-148a and miR-152 down regulate HLA-G                                                                                                   |

|               |                                                                     |                                                                                                                    |                                                                                                                                                                                                                                                                                                                                                                                                     |                                                                  |
|---------------|---------------------------------------------------------------------|--------------------------------------------------------------------------------------------------------------------|-----------------------------------------------------------------------------------------------------------------------------------------------------------------------------------------------------------------------------------------------------------------------------------------------------------------------------------------------------------------------------------------------------|------------------------------------------------------------------|
| Abbreviations | (EVT=extravillous trophoblast) (PTB=preterm birth, PE=preeclampsia) | (Chorionic villus sampline = CVS, EVT=extravillous trophoblast, CB=cord blood, CL= Cell line, PB=Peripheral Blood) | (IHC=immunohistochemistry, ICC=immunocytochemistry,FC=flow cytometry, WB=western blot, ELISA=enzyme linked immunoabsorbance assay, PCR=polymerase chain reaction, ISH=in situ hybridization, NB=northern blot, RT PCR=real time PCR, dPCR=DNA PCR, rPCR=RNA PCR, IF=immunoflouresence, IP=immunoprecipitation, SB=Southern Blot, EM=electron microscopy, EMSA=Electrophoretic mobility shift assay) | (PTB=preterm birth,PPROM=preterm premature rupture of membranes) |
|---------------|---------------------------------------------------------------------|--------------------------------------------------------------------------------------------------------------------|-----------------------------------------------------------------------------------------------------------------------------------------------------------------------------------------------------------------------------------------------------------------------------------------------------------------------------------------------------------------------------------------------------|------------------------------------------------------------------|
